# Supplementary material for: Intestinal Radiation Protection and Mitigation by Second-Generation Probiotic Lactobacillus-reuteri Engineered to Deliver Interleukin-22
Source: MDPI journal article supplement (doi:10.3390/ijms23105616), 2022-05-17

**Supplemental Figures:** Supplemental Figure S1: Intestine levels of each of 33 cytokines over 7 days after WAI. Supplemental Figure S2: Plasma levels of each of 33 cytokines over 7 days after WAI.

Supplemental Figure S1:

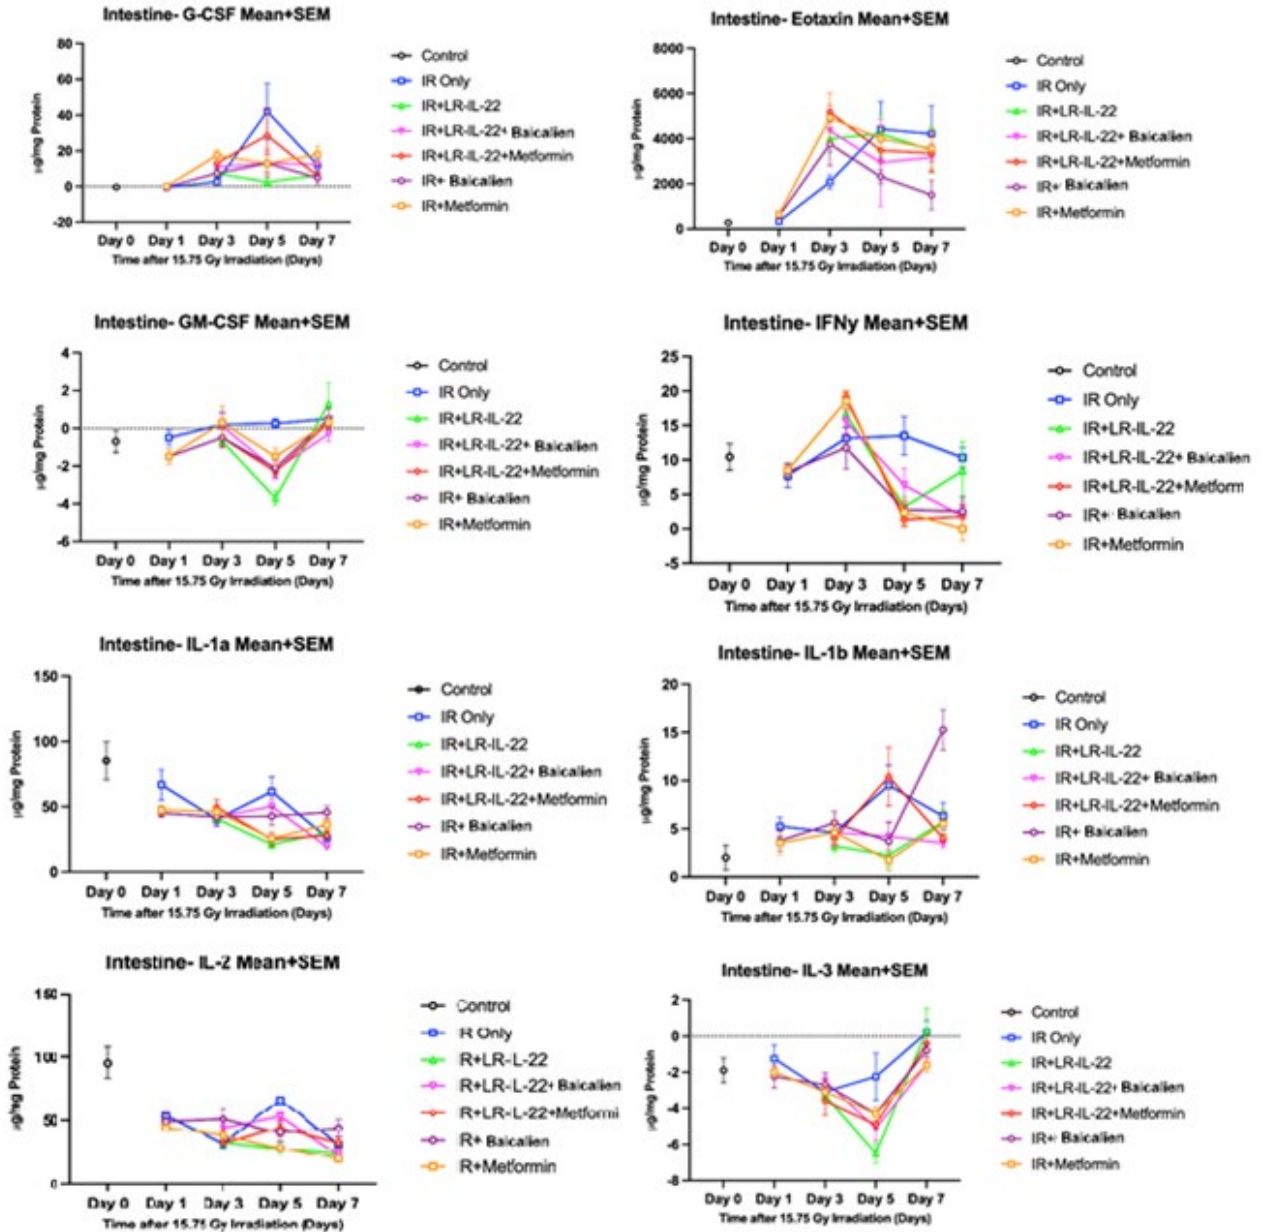

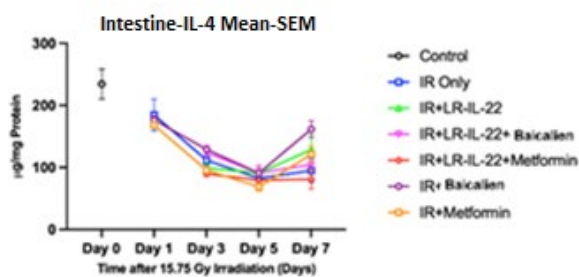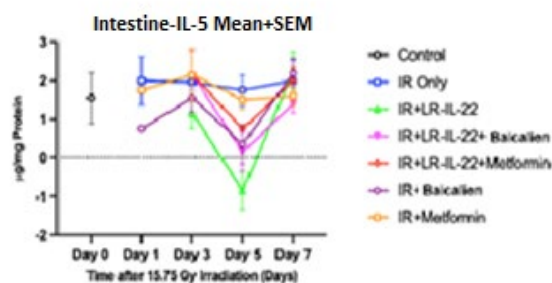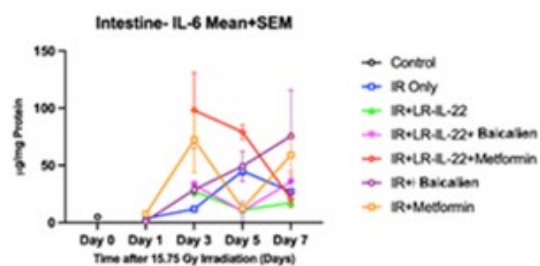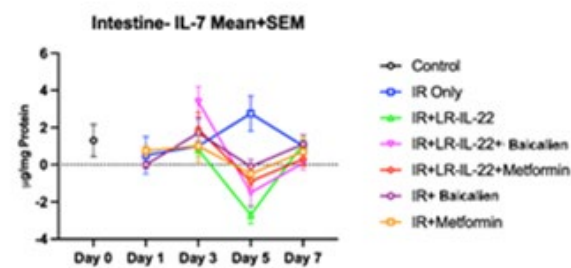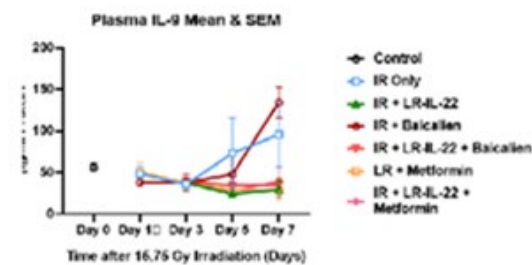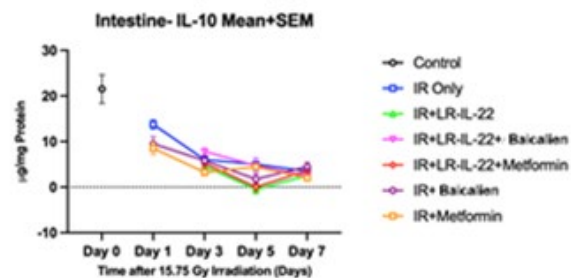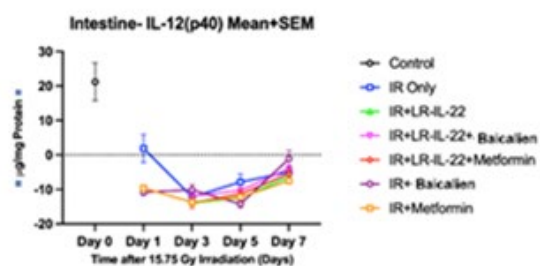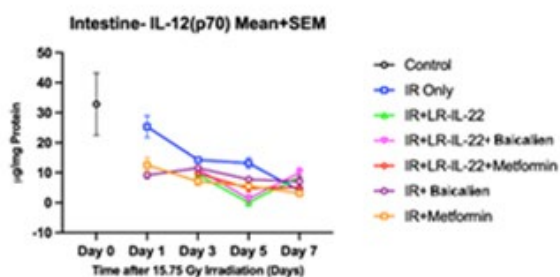

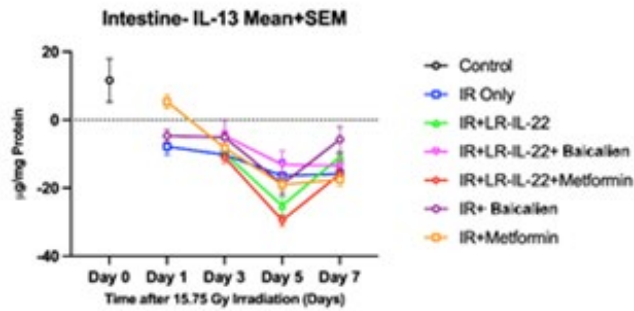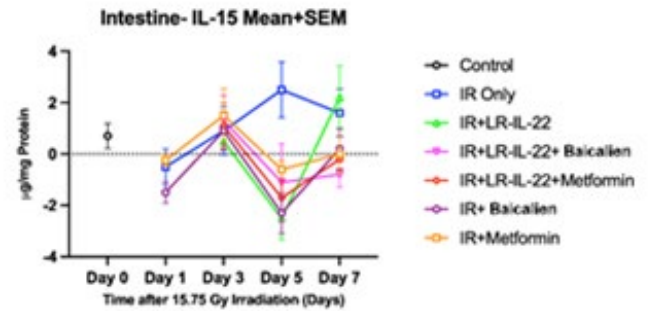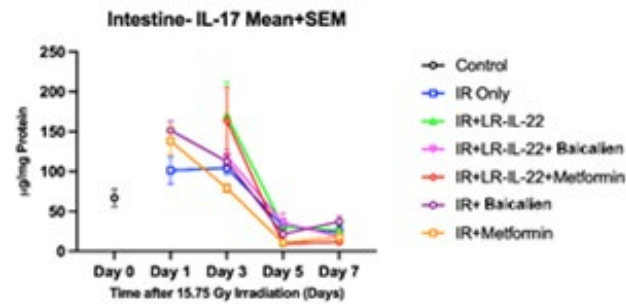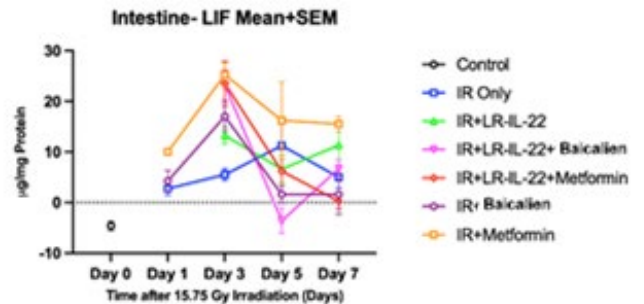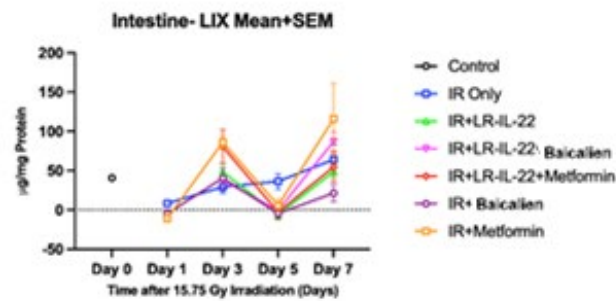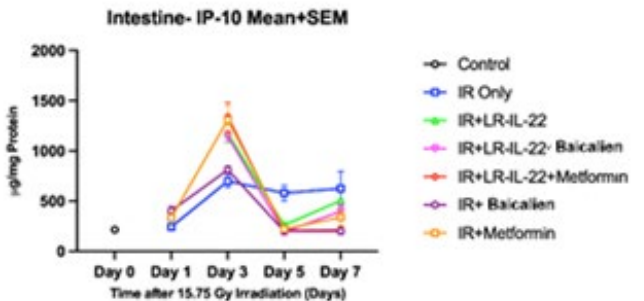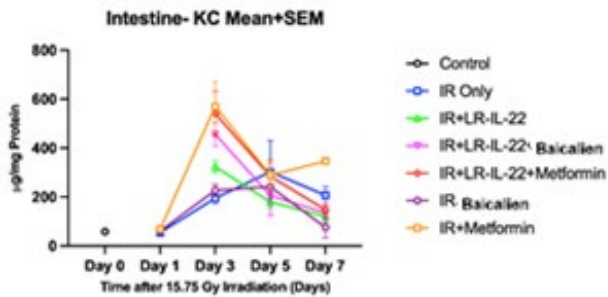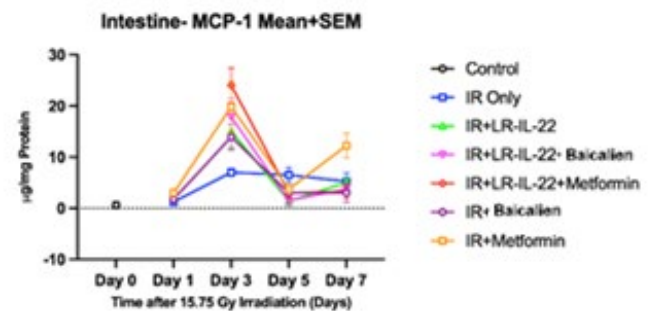

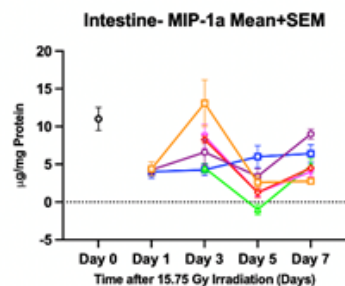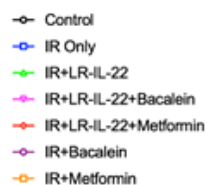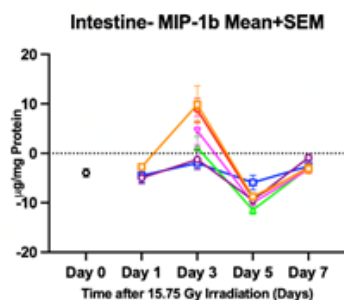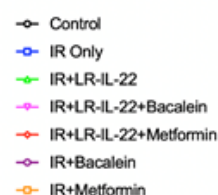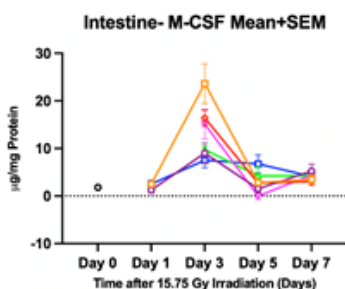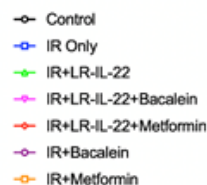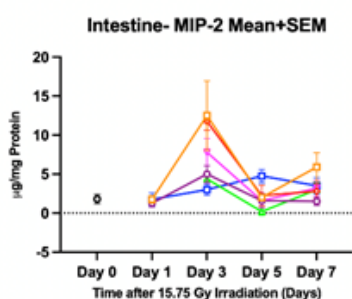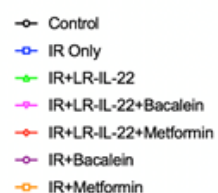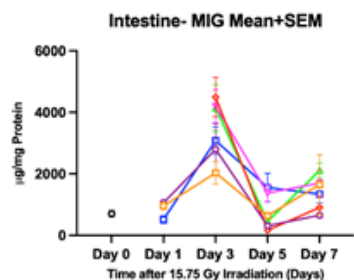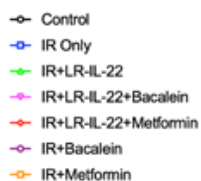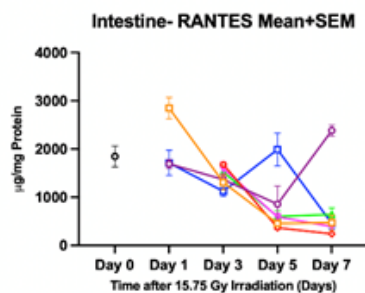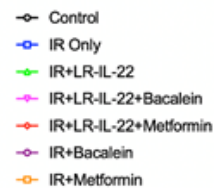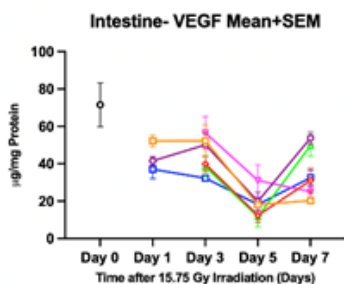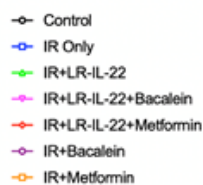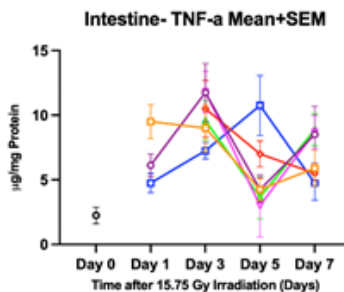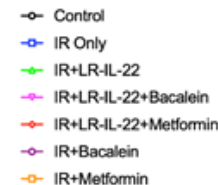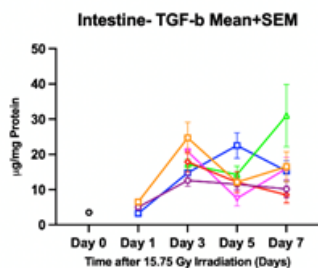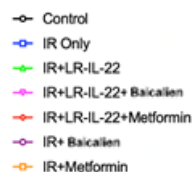



Supplemental Figure S2:

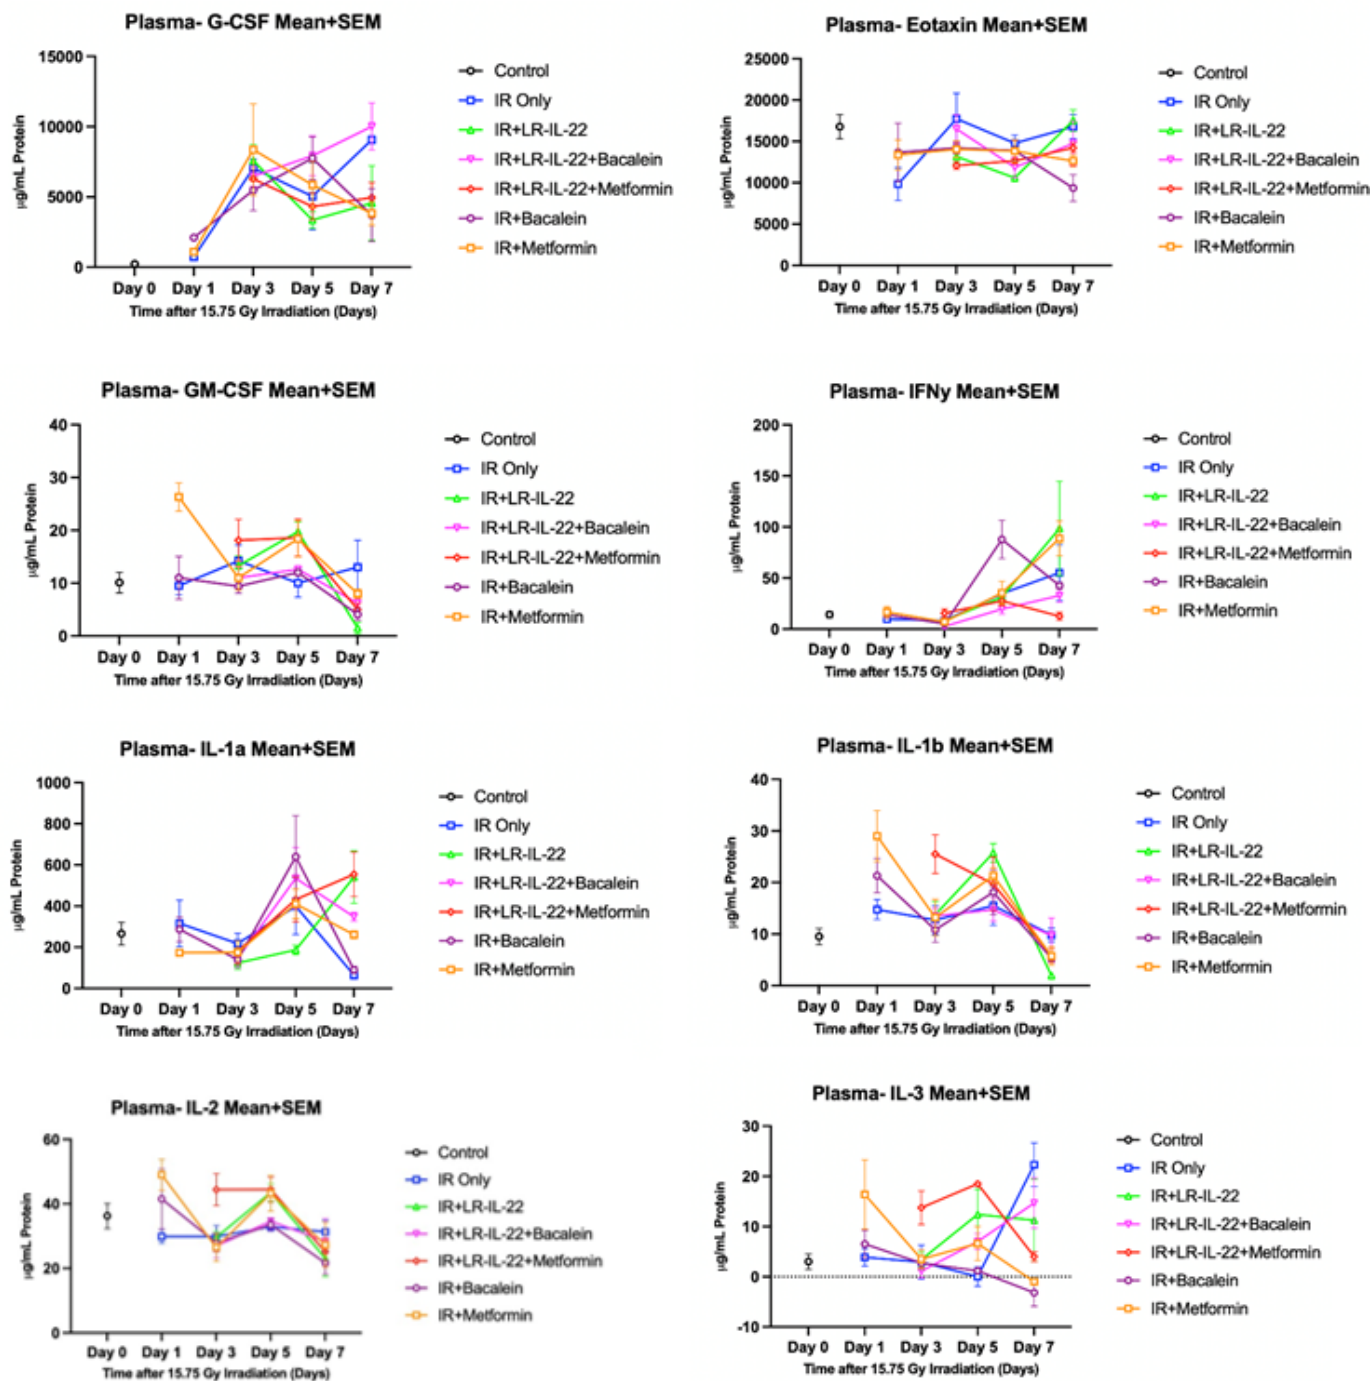

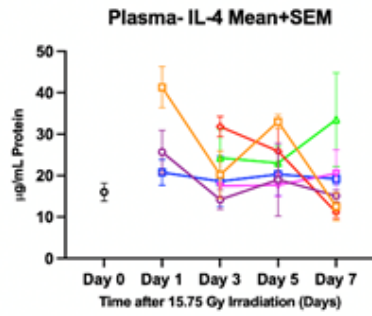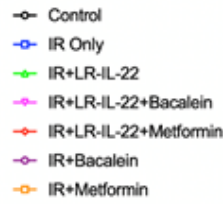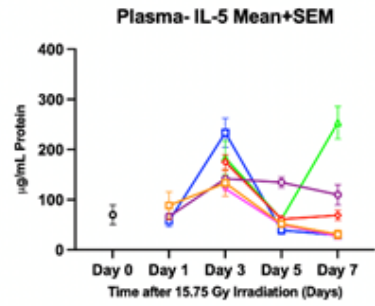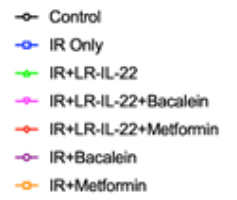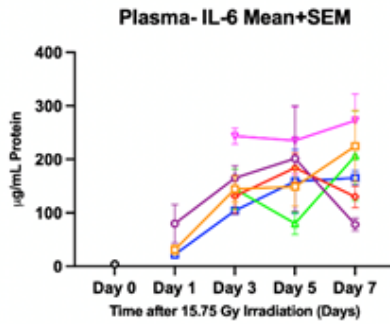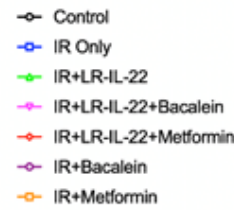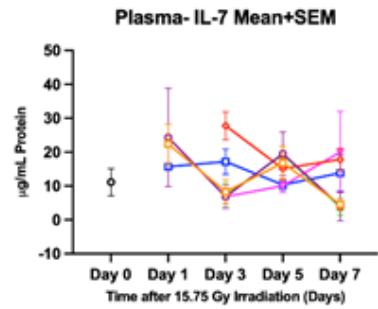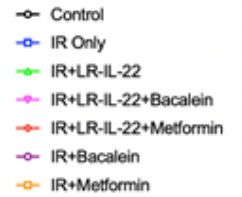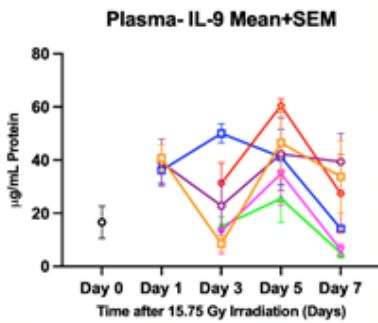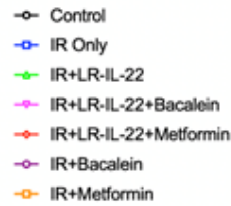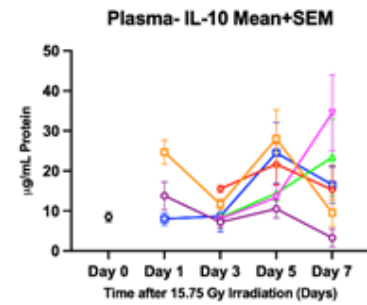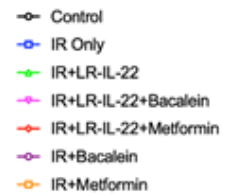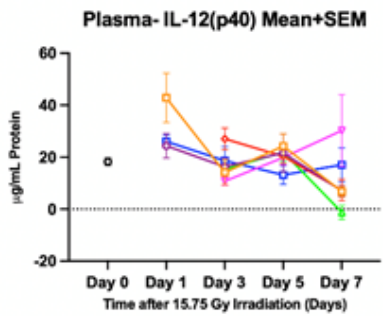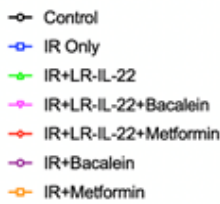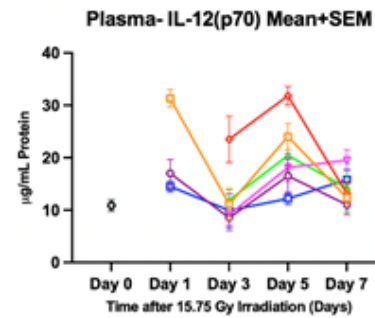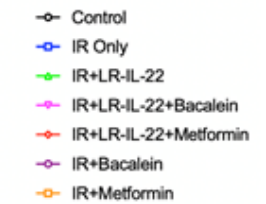

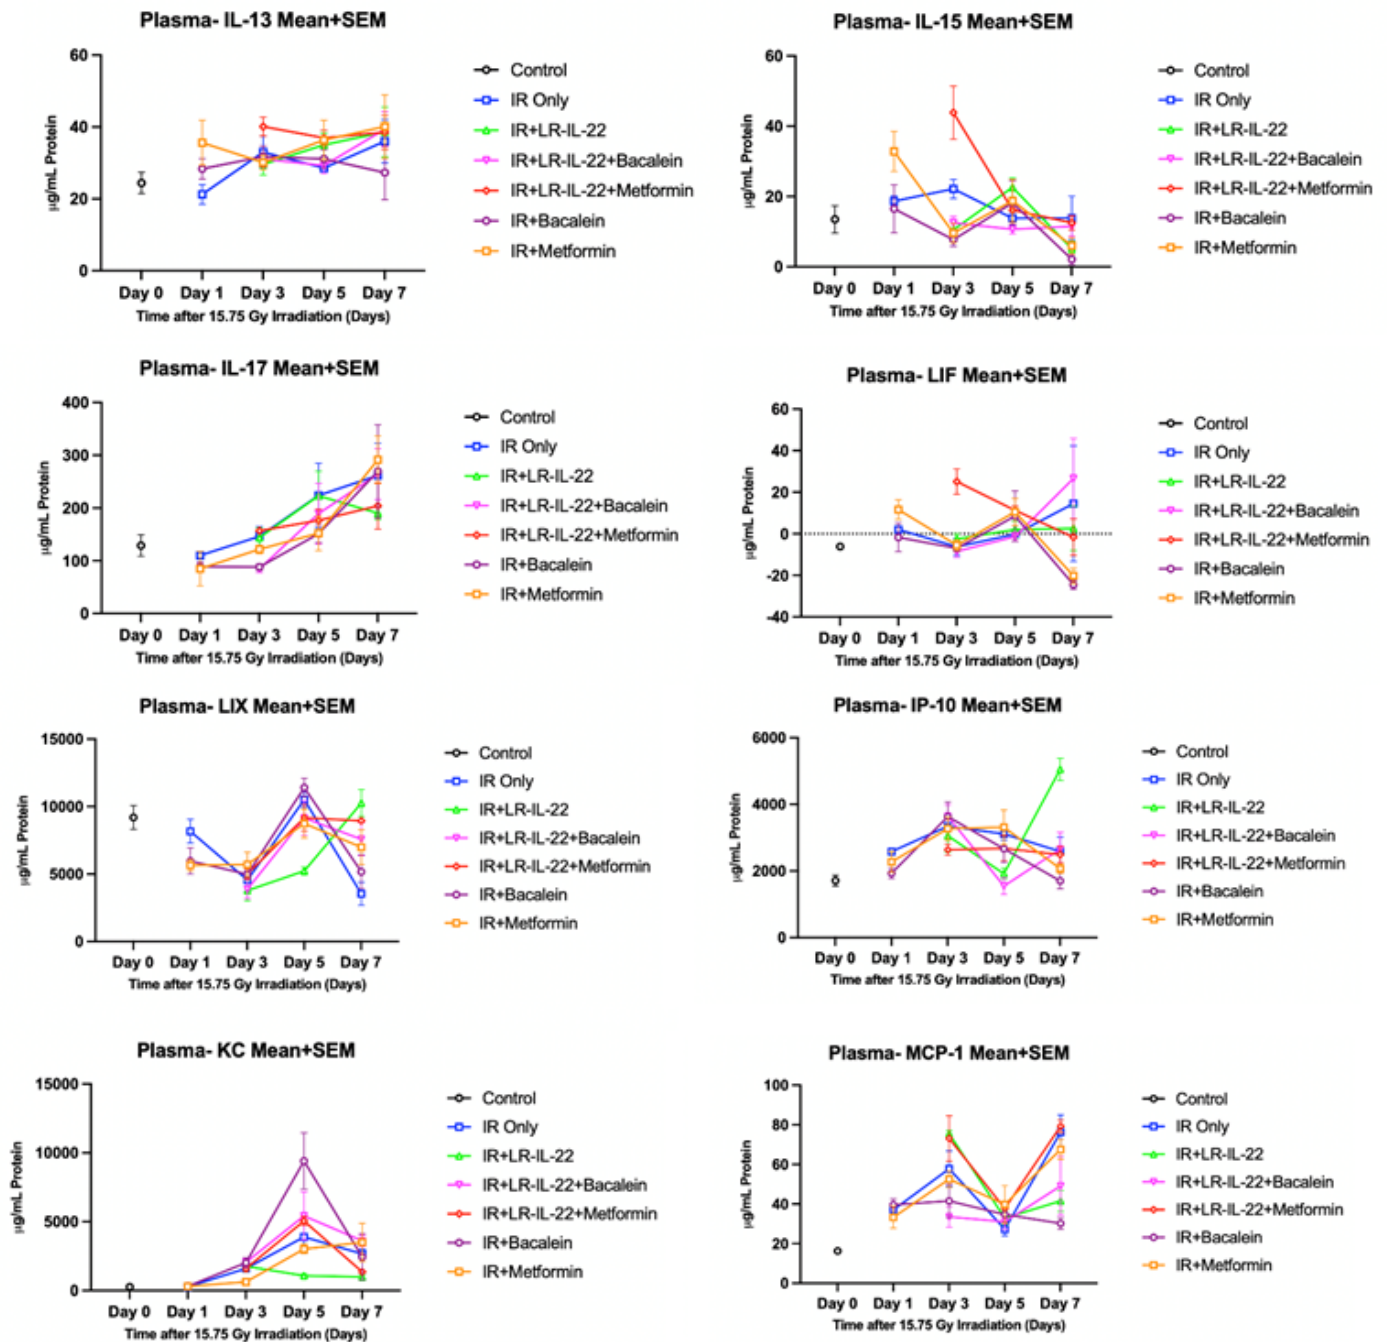

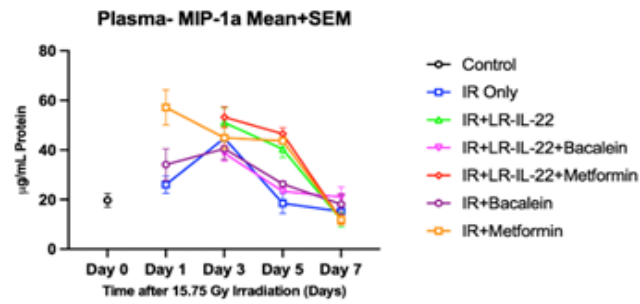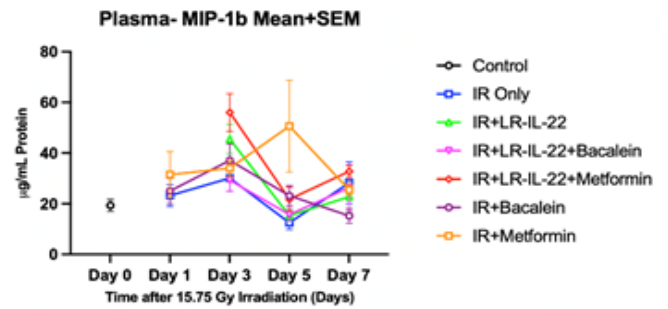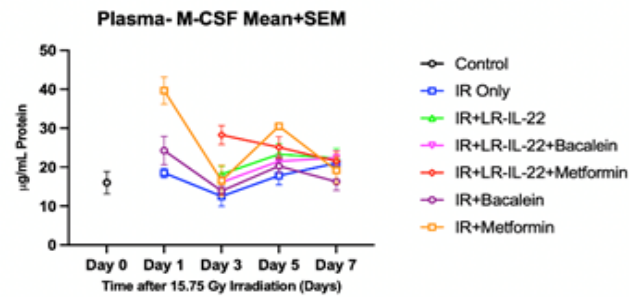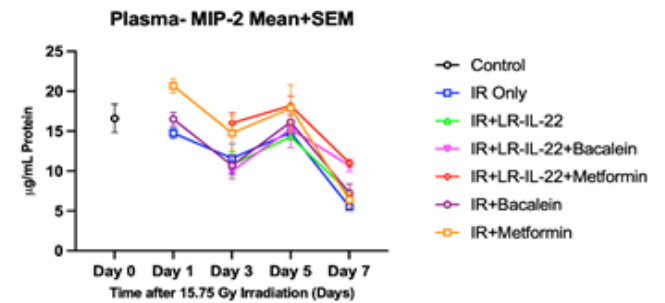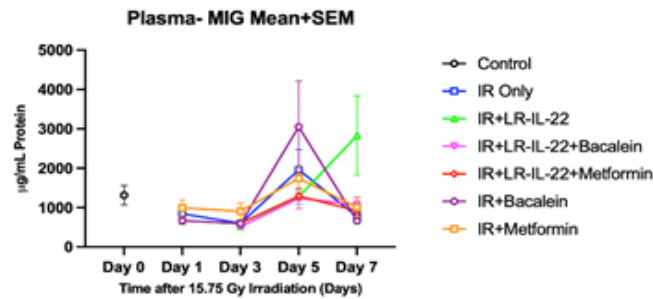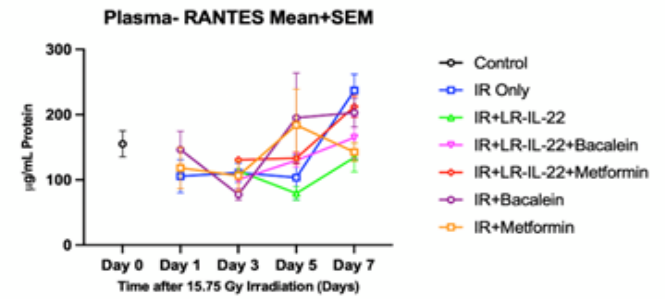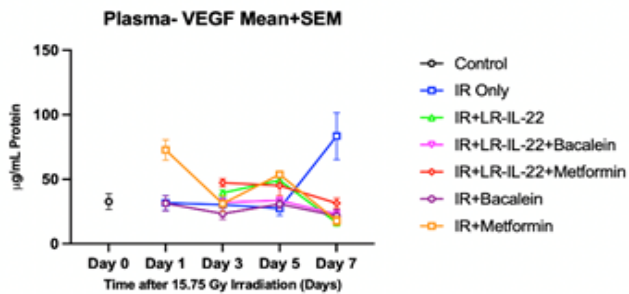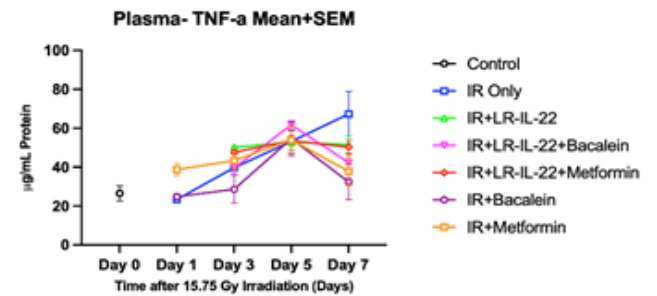



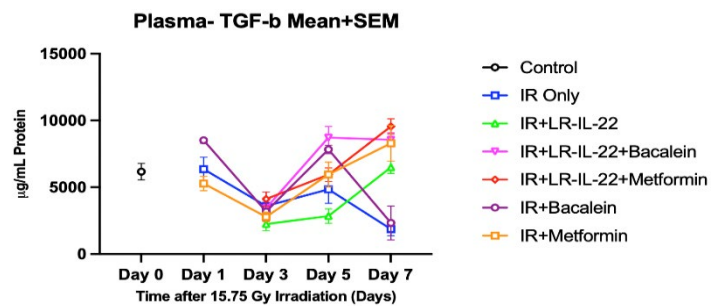

Supplement: s1 [file s1]
